# Supplementary material
Source: MDPI journal article supplement (https://www.mdpi.com/search?q=jof-02-00028)
Supplement: s001 [file jof-02-00028-s001.pdf]

# Supplementary Materials: Phylogenetic Analysis of the Synnema-Producing Genus *Synnemapestaloides*

Kyoko Watanabe, Mao Sekiguchi, Toyozo Sato, Tom Hsiang, Shigeru Kaneko, Kazuaki Tanaka, Masaru Kanda, Naoko Fujita and Shunsuke Nozawa

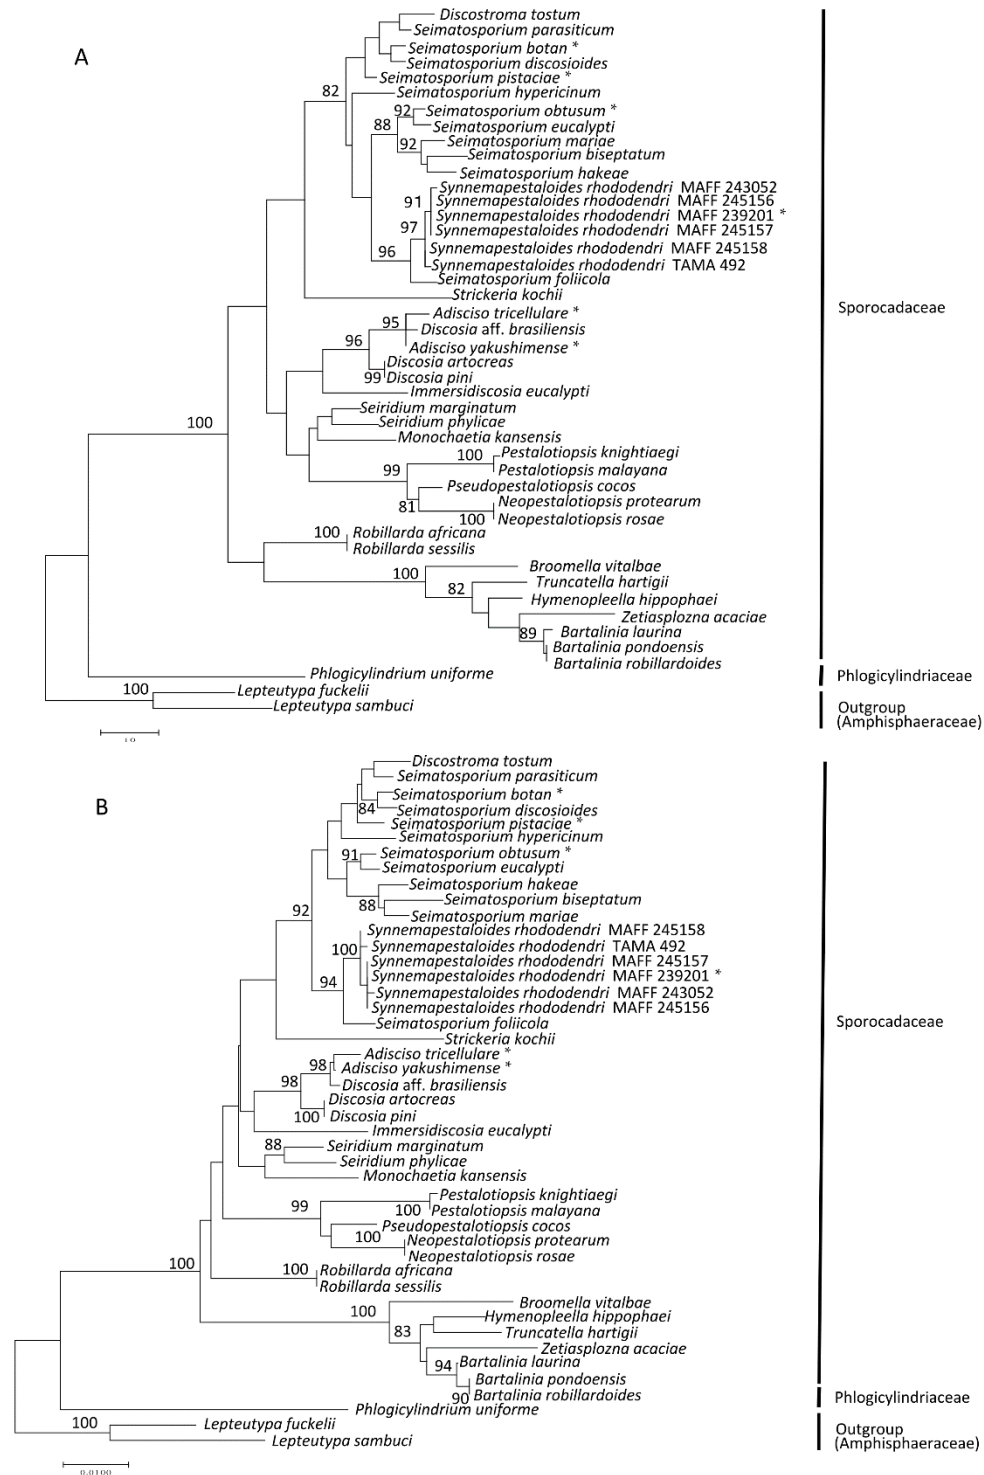

**Figure S1.** Phylogenetic trees based on analysis of ITS and LSU (D1–D2) sequences. Numbers on the branches indicate the bootstrap values (%) for each node, calculated from 1,000 replicates. **(A)**, MP tree; **(B)**, NJ tree. \*: Ex-holotype cultures.

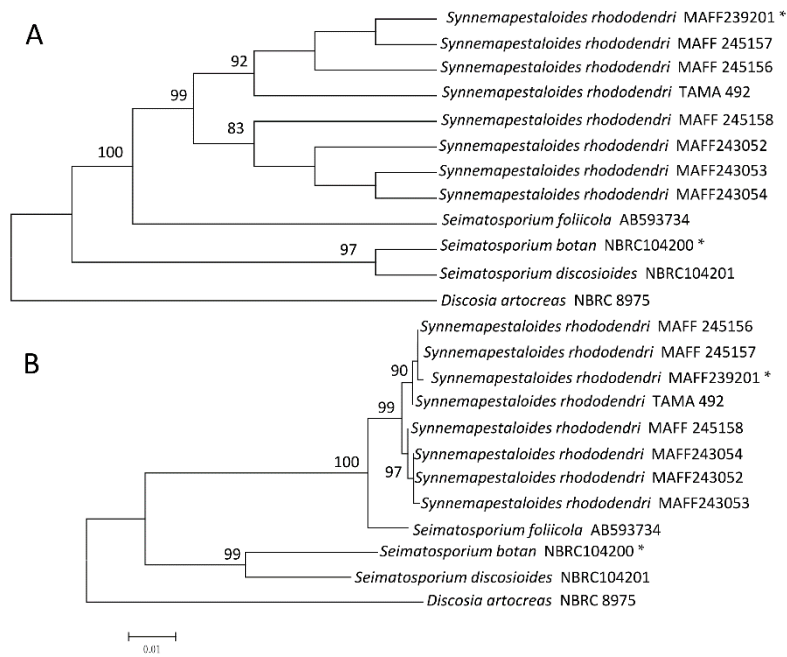

**Figure S2.** Phylogenetic trees based on ITS and  $\beta$ -*tubulin* sequences. The numbers on the branches indicate bootstrap values (%) for each node, calculated from 1,000 replicates. **(A)**, MP tree; **(B)**, NJ tree. \*: Ex-holotype cultures.
